# Supplementary material
Source: Springer Nature journal article supplement (https://www.springermedizin.de/resource/supplementary/13256_2009_938_MOESM7_ESM.pdf/9646858)
Supplement: MOESM7 [file 9646858]

A

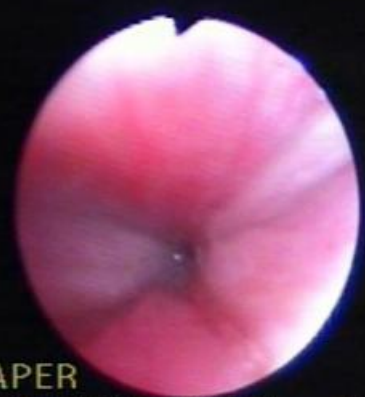

1 2  
3 4

NO PAPER  
QTY1 1/1FRM NORM VIDEO

C

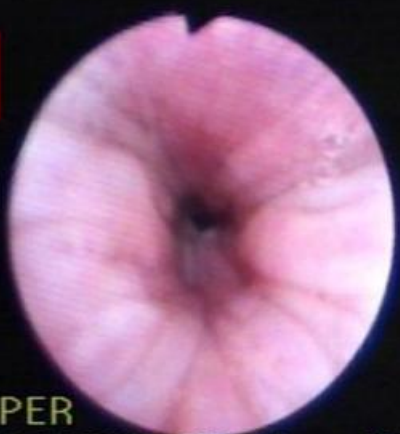

2  
3 4

PAPER  
'1 1/1FRM NORM VIDEO

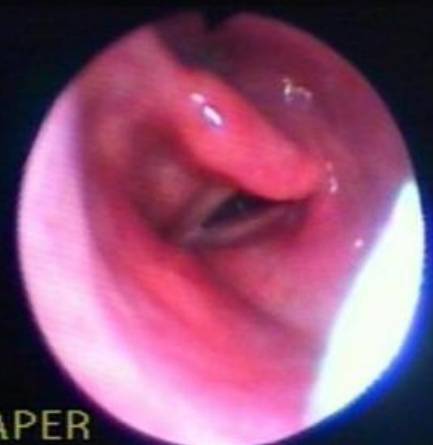

1  
3

PAPER  
QTY1 1/1FRM NORM VIDEO

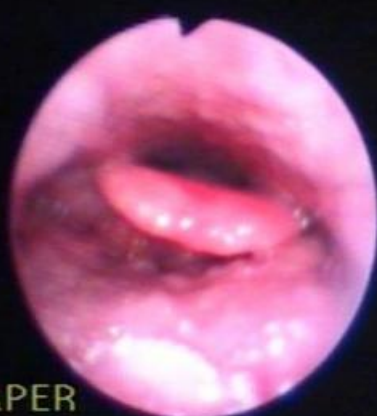

1  
3 4

NO PAPER  
QTY1 1/1FRM NORM VIDEO
